# Supplementary material
Source: HighWire-hosted journal article supplement (doi:10.1101/gr.280985.125)
Supplement: Supplemental_Methods.pdf [file Supplemental_Methods.pdf]

# Supporting information to "Simultaneous modeling of chromatin conformation changes from multiple single-cell interaction maps"

Krzysztof H. Banecki, Haoxi Chai, Yijun Ruan, Dariusz Plewczynski

December 2025

## S1 Appendix

### Frame force coefficient

Parameters used for the ChromMovie frame force coefficient study (Figure 1B of the manuscript). The full configuration file (`config.yaml`) is provided below.

```
1 descriptions:
2   general:
3     input: 'Folder containing input scHi-C contacts in csv format. If None simulated
4       scHi-C maps are going to be used.'
5     output: 'Output folder for storing simulation results.'
6     genome: 'Genome assembly of the input data. Currently supported assemblies: hg19,
7       hg38, mm10, GRCm39, GRCg6a.'
8     pdf_report: 'Whether to save the simulation diagnostics in a pdf format.'
9     remove_problematic: 'A flag indicating whether at each resolution round
10      problematic contacts that the simulation was unable to resolve,
11      should be removed.'
12   simulation:
13     platform: 'Available platforms: CPU, CUDA and OpenCL.'
14     resolutions: 'Resolutions to be used for hierarchical modeling. Expected to be
15       in the form of comma separated integer of float numbers in the units of Mb.'
16     N_steps: 'Number of simulation steps to take at every resolution.'
17     burnin: 'Number of simulation steps before starting collecting the simulation
18       diagnostic data.'
19     MC_step: 'Simulation diagnostic data is going to be collected every MC_step.'
20     sim_step: 'The simulation step of Langevin integrator.'
21   forcefield:
22     ev_formula: 'Type of the Excluded Volume (EV) repulsion. Available types:
23       harmonic.'
24     ev_min_dist: 'Excluded Volume (EV) minimal distance.'
25     ev_coef: 'Excluded Volume (EV) force coefficient.'
26     ev_coefevol: 'Enable or disable the changing EV coefficient value.
27
28     If True the coefficient will start as 0 at the beginning of the simulation and
29     reach ev_coef at the end.
30
31     If False the coefficient will have stable value of ev_coef.'
32   bb_formula: 'Type of the Backbone (BB) potential. Available types:
33     harmonic, gaussian.'
34   bb_opt_dist: 'Backbone (BB) optimal distance.'
35   bb_lin_thresh: 'Backbone (BB) distance after which the potential grows linearly.
36
```

```

37     Must be strictly greater than bb_opt_dist.
38
39     Only applicable if bb_formula is harmonic.'
40 bb_coef: 'Backbone (BB) force coefficient.'
41 bb_coefevol: 'Enable or disable the changing BB coefficient value.
42
43     If True the coefficient will start as 0 at the beginning of the simulation and
44     reach bb_coef at the end.
45
46     If False the coefficient will have stable value of bb_coef.'
47 sc_formula: 'Type of the Single cell contact (SC) potential. Available types:
48     harmonic, gaussian.'
49 sc_opt_dist: 'Single cell contact (SC) optimal distance.'
50 sc_lin_thresh: 'Single cell contact (SC) distance after which the potential grows
51     linearly.
52
53     Must be strictly greater than sc_opt_dist.
54
55     Only applicable if sc_formula is harmonic.'
56 sc_coef: 'Single cell contact (SC) force coefficient.'
57 sc_coefevol: 'Enable or disable the changing SC coefficient value.
58
59     If True the coefficient will start as 0 at the beginning of the simulation and
60     reach sc_coef at the end.
61
62     If False the coefficient will have stable value of sc_coef.'
63 ff_formula: 'Type of the Frame force (FF) potential. Available types: harmonic,
64     gaussian.'
65 ff_opt_dist: 'Frame force (FF) optimal distance.'
66 ff_lin_thresh: 'Frame force (FF) distance after which the potential grows
67     linearly.
68
69     Must be strictly greater than ff_opt_dist.
70
71     Only applicable if ff_formula is harmonic.'
72 ff_coef: 'Frame force (FF) force coefficient.'
73 ff_coefevol: 'Enable or disable the changing FF coefficient value.
74
75     If True the coefficient will start as 0 at the beginning of the simulation and
76     reach ff_coef at the end.
77
78     If False the coefficient will have stable value of ff_coef.'
79 general:
80     input: data/data_ff_study
81     output: ./results/tests/test17/
82     genome: mm10
83     pdf_report: false
84     remove_problematic: false
85 simulation:
86     platform: OpenCL
87     resolutions: 5,2
88     N_steps: 100
89     burnin: 5
90     MC_step: 1

```

```

91   sim_step: 20
92 forcefield:
93   ev_formula: harmonic
94   ev_min_dist: 1.0
95   ev_coef: 1000.0
96   ev_coef_evol: false
97   bb_formula: harmonic
98   bb_opt_dist: 1.0
99   bb_lin_thresh: 2.0
100  bb_coef: 1000.0
101  bb_coef_evol: false
102  sc_formula: harmonic
103  sc_opt_dist: 1.0
104  sc_lin_thresh: 2.0
105  sc_coef: 1000.0
106  sc_coef_evol: false
107  ff_formula: harmonic
108  ff_opt_dist: 1.0
109  ff_lin_thresh: 2.0
110  ff_coef: 90.77494998747494
111  ff_coef_evol: false

```

## Single-cell contact violation

Parameters used for the ChromMovie single-cell contact violation study (Figure 1D and 1E of the manuscript). The full configuration file (`config.yaml`) is provided below.

```

1  descriptions:
2    general:
3      input: 'Folder containing input scHi-C contacts in csv format. If None simulated
4        scHi-C maps are going to be used.'
5      output: 'Output folder for storing simulation results.'
6      genome: 'Genome assembly of the input data. Currently supported assemblies: hg19,
7        hg38, mm10, GRCm39, GRCg6a.'
8      pdf_report: 'Whether to save the simulation diagnostics in a pdf format.'
9      remove_problematic: 'A flag indicating whether at each resolution round
10       problematic contacts that the simulation was unable to resolve,
11       should be removed.'
12    simulation:
13      platform: 'Available platforms: CPU, CUDA and OpenCL.'
14      resolutions: 'Resolutions to be used for hierarchical modeling. Expected to be
15        in the form of comma separated integer of float numbers in the units of Mb.'
16      N_steps: 'Number of simulation steps to take at every resolution.'
17      burnin: 'Number of simulation steps before starting collecting the simulation
18        diagnostic data.'
19      MC_step: 'Simulation diagnostic data is going to be collected every MC_step.'
20      sim_step: 'The simulation step of Langevin integrator.'
21    forcefield:
22      ev_formula: 'Type of the Excluded Volume (EV) repulsion. Available types:
23        harmonic.'
24      ev_min_dist: 'Excluded Volume (EV) minimal distance.'
25      ev_coef: 'Excluded Volume (EV) force coefficient.'
26      ev_coef_evol: 'Enable or disable the changing EV coefficient value.'
27

```

```
28     If True the coefficient will start as 0 at the beginning of the simulation and
29     reach ev_coef at the end.
30
31     If False the coefficient will have stable value of ev_coef.'
32 bb_formula: 'Type of the Backbone (BB) potential. Available types:
33     harmonic, gaussian.'
34 bb_opt_dist: 'Backbone (BB) optimal distance.'
35 bb_lin_thresh: 'Backbone (BB) distance after which the potential grows linearly.
36
37     Must be strictly greater than bb_opt_dist.
38
39     Only applicable if bb_formula is harmonic.'
40 bb_coef: 'Backbone (BB) force coefficient.'
41 bb_coefevol: 'Enable or disable the changing BB coefficient value.
42
43     If True the coefficient will start as 0 at the beginning of the simulation and
44     reach bb_coef at the end.
45
46     If False the coefficient will have stable value of bb_coef.'
47 sc_formula: 'Type of the Single cell contact (SC) potential. Available types:
48     harmonic, gaussian.'
49 sc_opt_dist: 'Single cell contact (SC) optimal distance.'
50 sc_lin_thresh: 'Single cell contact (SC) distance after which the potential grows
51     linearly.
52
53     Must be strictly greater than sc_opt_dist.
54
55     Only applicable if sc_formula is harmonic.'
56 sc_coef: 'Single cell contact (SC) force coefficient.'
57 sc_coefevol: 'Enable or disable the changing SC coefficient value.
58
59     If True the coefficient will start as 0 at the beginning of the simulation and
60     reach sc_coef at the end.
61
62     If False the coefficient will have stable value of sc_coef.'
63 ff_formula: 'Type of the Frame force (FF) potential. Available types: harmonic,
64     gaussian.'
65 ff_opt_dist: 'Frame force (FF) optimal distance.'
66 ff_lin_thresh: 'Frame force (FF) distance after which the potential grows
67     linearly.
68
69     Must be strictly greater than ff_opt_dist.
70
71     Only applicable if ff_formula is harmonic.'
72 ff_coef: 'Frame force (FF) force coefficient.'
73 ff_coefevol: 'Enable or disable the changing FF coefficient value.
74
75     If True the coefficient will start as 0 at the beginning of the simulation and
76     reach ff_coef at the end.
77
78     If False the coefficient will have stable value of ff_coef.'
79 general:
80 input: examples/example1_cell_cycle
81 output: ./results/results_sccv/
```

```

82 genome: mm10
83 pdf_report: true
84 remove_problematic: false
85 simulation:
86 platform: OpenCL
87 resolutions: 5,2
88 N_steps: 50
89 burnin: 0
90 MC_step: 1
91 sim_step: 20
92 forcefield:
93 ev_formula: harmonic
94 ev_min_dist: 2.0
95 ev_coef: 50.0
96 ev_coef_evol: false
97 bb_formula: harmonic
98 bb_opt_dist: 1.0
99 bb_lin_thresh: 2.0
100 bb_coef: 1000.0
101 bb_coef_evol: false
102 sc_formula: harmonic
103 sc_opt_dist: 1.0
104 sc_lin_thresh: 2.0
105 sc_coef: 100.0
106 sc_coef_evol: false
107 ff_formula: harmonic
108 ff_opt_dist: 1.0
109 ff_lin_thresh: 2.0
110 ff_coef: 100.0
111 ff_coef_evol: false

```

## Comparison with NucDynamics

Parameters used for the ChromMovie comparison with NucDynamics study (Figure 2 and Figure 3 of the manuscript). The full configuration file (`config.yaml`) is provided below.

```

1 descriptions:
2   general:
3     input: 'Folder containing input scHi-C contacts in csv format. If None simulated
4       scHi-C maps are going to be used.'
5     output: 'Output folder for storing simulation results.'
6     genome: 'Genome assembly of the input data. Currently supported assemblies: hg19,
7       hg38, mm10, GRCm39, GRCg6a.'
8     pdf_report: 'Whether to save the simulation diagnostics in a pdf format.'
9     remove_problematic: 'A flag indicating whether at each resolution round
10      problematic contacts that the simulation was unable to resolve,
11      should be removed.'
12   simulation:
13     platform: 'Available platforms: CPU, CUDA and OpenCL.'
14     resolutions: 'Resolutions to be used for hierarchical modeling. Expected to be
15       in the form of comma separated integer of float numbers in the units of Mb.'
16     N_steps: 'Number of simulation steps to take at every resolution.'
17     burnin: 'Number of simulation steps before starting collecting the simulation
18       diagnostic data.'

```

```

19     MC_step: 'Simulation diagnostic data is going to be collected every MC_step.'
20     sim_step: 'The simulation step of Langevin integrator.'
21 forcefield:
22     ev_formula: 'Type of the Excluded Volume (EV) repulsion. Available types:
23         harmonic.'
24     ev_min_dist: 'Excluded Volume (EV) minimal distance.'
25     ev_coef: 'Excluded Volume (EV) force coefficient.'
26     ev_coefevol: 'Enable or disable the changing EV coefficient value.
27
28         If True the coefficient will start as 0 at the beginning of the simulation and
29         reach ev_coef at the end.
30
31         If False the coefficient will have stable value of ev_coef.'
32     bb_formula: 'Type of the Backbone (BB) potential. Available types:
33         harmonic, gaussian.'
34     bb_opt_dist: 'Backbone (BB) optimal distance.'
35     bb_lin_thresh: 'Backbone (BB) distance after which the potential grows linearly.
36
37         Must be strictly greater than bb_opt_dist.
38
39         Only applicable if bb_formula is harmonic.'
40     bb_coef: 'Backbone (BB) force coefficient.'
41     bb_coefevol: 'Enable or disable the changing BB coefficient value.
42
43         If True the coefficient will start as 0 at the beginning of the simulation and
44         reach bb_coef at the end.
45
46         If False the coefficient will have stable value of bb_coef.'
47     sc_formula: 'Type of the Single cell contact (SC) potential. Available types:
48         harmonic, gaussian.'
49     sc_opt_dist: 'Single cell contact (SC) optimal distance.'
50     sc_lin_thresh: 'Single cell contact (SC) distance after which the potential grows
51         linearly.
52
53         Must be strictly greater than sc_opt_dist.
54
55         Only applicable if sc_formula is harmonic.'
56     sc_coef: 'Single cell contact (SC) force coefficient.'
57     sc_coefevol: 'Enable or disable the changing SC coefficient value.
58
59         If True the coefficient will start as 0 at the beginning of the simulation and
60         reach sc_coef at the end.
61
62         If False the coefficient will have stable value of sc_coef.'
63     ff_formula: 'Type of the Frame force (FF) potential. Available types: harmonic,
64         gaussian.'
65     ff_opt_dist: 'Frame force (FF) optimal distance.'
66     ff_lin_thresh: 'Frame force (FF) distance after which the potential grows
67         linearly.
68
69         Must be strictly greater than ff_opt_dist.
70
71         Only applicable if ff_formula is harmonic.'
72     ff_coef: 'Frame force (FF) force coefficient.'

```

```

73     ff_coefevol: 'Enable or disable the changing FF coefficient value.
74
75     If True the coefficient will start as 0 at the beginning of the simulation and
76     reach ff_coef at the end.
77
78     If False the coefficient will have stable value of ff_coef.'
79 general:
80     input: ./data/cell_cycle/chr12
81     output: ./results/results_k562_chr12/
82     genome: hg38
83     pdf_report: false
84     remove_problematic: false
85 simulation:
86     platform: OpenCL
87     resolutions: 2,0.5,0.1
88     N_steps: 50
89     burnin: 0
90     MC_step: 1
91     sim_step: 20
92 forcefield:
93     ev_formula: harmonic
94     ev_min_dist: 2.0
95     ev_coef: 40.0
96     ev_coefevol: false
97     bb_formula: harmonic
98     bb_opt_dist: 1.0
99     bb_lin_thresh: 2.0
100    bb_coef: 1000.0
101    bb_coefevol: false
102    sc_formula: harmonic
103    sc_opt_dist: 1.0
104    sc_lin_thresh: 2.0
105    sc_coef: 20.0
106    sc_coefevol: false
107    ff_formula: harmonic
108    ff_opt_dist: 1.0
109    ff_lin_thresh: 2.0
110    ff_coef: 1000.0
111    ff_coefevol: false

```

## Mitotic chromosome formation

Parameters used for the ChromMovie mitotic chromosome formation study (Figure 4A of the manuscript). The full configuration file (config.yaml) is provided below.

```

1 descriptions:
2   general:
3     input: 'Folder containing input scHi-C contacts in csv format. If None simulated
4           scHi-C maps are going to be used.'
5     output: 'Output folder for storing simulation results.'
6     genome: 'Genome assembly of the input data. Currently supported assemblies: hg19,
7             hg38, mm10, GRCm39, GRCg6a.'
8     pdf_report: 'Whether to save the simulation diagnostics in a pdf format.'
9     remove_problematic: 'A flag indicating whether at each resolution round

```

```

10     problematic contacts that the simulation was unable to resolve,
11     should be removed.'
12 simulation:
13     platform: 'Available platforms: CPU, CUDA and OpenCL.'
14     resolutions: 'Resolutions to be used for hierarchical modeling. Expected to be
15     in the form of comma separated integer or float numbers in the units of Mb.'
16     N_steps: 'Number of simulation steps to take at every resolution.'
17     burnin: 'Number of simulation steps before starting collecting the simulation
18     diagnostic data.'
19     MC_step: 'Simulation diagnostic data is going to be collected every MC_step.'
20     sim_step: 'The simulation step of Langevin integrator.'
21 forcefield:
22     ev_formula: 'Type of the Excluded Volume (EV) repulsion. Available types:
23     harmonic.'
24     ev_min_dist: 'Excluded Volume (EV) minimal distance.'
25     ev_coef: 'Excluded Volume (EV) force coefficient.'
26     ev_coefevol: 'Enable or disable the changing EV coefficient value.
27
28     If True the coefficient will start as 0 at the beginning of the simulation and
29     reach ev_coef at the end.
30
31     If False the coefficient will have stable value of ev_coef.'
32     bb_formula: 'Type of the Backbone (BB) potential. Available types:
33     harmonic, gaussian.'
34     bb_opt_dist: 'Backbone (BB) optimal distance.'
35     bb_lin_thresh: 'Backbone (BB) distance after which the potential grows linearly.
36
37     Must be strictly greater than bb_opt_dist.
38
39     Only applicable if bb_formula is harmonic.'
40     bb_coef: 'Backbone (BB) force coefficient.'
41     bb_coefevol: 'Enable or disable the changing BB coefficient value.
42
43     If True the coefficient will start as 0 at the beginning of the simulation and
44     reach bb_coef at the end.
45
46     If False the coefficient will have stable value of bb_coef.'
47     sc_formula: 'Type of the Single cell contact (SC) potential. Available types:
48     harmonic, gaussian.'
49     sc_opt_dist: 'Single cell contact (SC) optimal distance.'
50     sc_lin_thresh: 'Single cell contact (SC) distance after which the potential grows
51     linearly.
52
53     Must be strictly greater than sc_opt_dist.
54
55     Only applicable if sc_formula is harmonic.'
56     sc_coef: 'Single cell contact (SC) force coefficient.'
57     sc_coefevol: 'Enable or disable the changing SC coefficient value.
58
59     If True the coefficient will start as 0 at the beginning of the simulation and
60     reach sc_coef at the end.
61
62     If False the coefficient will have stable value of sc_coef.'
63     ff_formula: 'Type of the Frame force (FF) potential. Available types: harmonic,

```

```

64     gaussian.'
65 ff_opt_dist: 'Frame force (FF) optimal distance.'
66 ff_lin_thresh: 'Frame force (FF) distance after which the potential grows
67     linearly.
68
69     Must be strictly greater than ff_opt_dist.
70
71     Only applicable if ff_formula is harmonic.'
72 ff_coef: 'Frame force (FF) force coefficient.'
73 ff_coefevol: 'Enable or disable the changing FF coefficient value.
74
75     If True the coefficient will start as 0 at the beginning of the simulation and
76     reach ff_coef at the end.
77
78     If False the coefficient will have stable value of ff_coef.'
79 general:
80     input: data/data_mitotic
81     output: results/results_mitotic
82     genome: GRCg6a
83     pdf_report: true
84     remove_problematic: true
85 simulation:
86     platform: OpenCL
87     resolutions: 5,2,1,0.2,0.05
88     N_steps: 100
89     burnin: 10
90     MC_step: 1
91     sim_step: 100
92 forcefield:
93     ev_formula: harmonic
94     ev_min_dist: 2.0
95     ev_coef: 10.0
96     ev_coefevol: true
97     bb_formula: harmonic
98     bb_opt_dist: 1.0
99     bb_lin_thresh: 2.0
100    bb_coef: 10.0
101    bb_coefevol: false
102    sc_formula: harmonic
103    sc_opt_dist: 2.0
104    sc_lin_thresh: 2.5
105    sc_coef: 10.0
106    sc_coefevol: false
107    ff_formula: harmonic
108    ff_opt_dist: 1.0
109    ff_lin_thresh: 1.5
110    ff_coef: 10.0
111    ff_coefevol: false

```

## Downsampling

Parameters used for the ChromMovie downsampling study (Figure 4B of the manuscript). The full configuration file (config.yaml) is provided below.

```

1 descriptions:

```

```

2  general:
3      input: 'Folder containing input scHi-C contacts in csv format. If None simulated
4          scHi-C maps are going to be used.'
5      output: 'Output folder for storing simulation results.'
6      genome: 'Genome assembly of the input data. Currently supported assemblies: hg19,
7          hg38, mm10, GRCm39, GRCg6a.'
8      pdf_report: 'Whether to save the simulation diagnostics in a pdf format.'
9      remove_problematic: 'A flag indicating whether at each resolution round
10         problematic contacts that the simulation was unable to resolve,
11         should be removed.'
12  simulation:
13      platform: 'Available platforms: CPU, CUDA and OpenCL.'
14      resolutions: 'Resolutions to be used for hierarchical modeling. Expected to be
15         in the form of comma separated integer of float numbers in the units of Mb.'
16      N_steps: 'Number of simulation steps to take at every resolution.'
17      burnin: 'Number of simulation steps before starting collecting the simulation
18         diagnostic data.'
19      MC_step: 'Simulation diagnostic data is going to be collected every MC_step.'
20      sim_step: 'The simulation step of Langevin integrator.'
21  forcefield:
22      ev_formula: 'Type of the Excluded Volume (EV) repulsion. Available types:
23         harmonic.'
24      ev_min_dist: 'Excluded Volume (EV) minimal distance.'
25      ev_coef: 'Excluded Volume (EV) force coefficient.'
26      ev_coefevol: 'Enable or disable the changing EV coefficient value.
27
28         If True the coefficient will start as 0 at the beginning of the simulation and
29         reach ev_coef at the end.
30
31         If False the coefficient will have stable value of ev_coef.'
32      bb_formula: 'Type of the Backbone (BB) potential. Available types:
33         harmonic, gaussian.'
34      bb_opt_dist: 'Backbone (BB) optimal distance.'
35      bb_lin_thresh: 'Backbone (BB) distance after which the potential grows linearly.
36
37         Must be strictly greater than bb_opt_dist.
38
39         Only applicable if bb_formula is harmonic.'
40      bb_coef: 'Backbone (BB) force coefficient.'
41      bb_coefevol: 'Enable or disable the changing BB coefficient value.
42
43         If True the coefficient will start as 0 at the beginning of the simulation and
44         reach bb_coef at the end.
45
46         If False the coefficient will have stable value of bb_coef.'
47      sc_formula: 'Type of the Single cell contact (SC) potential. Available types:
48         harmonic, gaussian.'
49      sc_opt_dist: 'Single cell contact (SC) optimal distance.'
50      sc_lin_thresh: 'Single cell contact (SC) distance after which the potential grows
51         linearly.
52
53         Must be strictly greater than sc_opt_dist.
54
55         Only applicable if sc_formula is harmonic.'

```

```

56     sc_coef: 'Single cell contact (SC) force coefficient.'
57     sc_coefevol: 'Enable or disable the changing SC coefficient value.
58
59         If True the coefficient will start as 0 at the beginning of the simulation and
60         reach sc_coef at the end.
61
62         If False the coefficient will have stable value of sc_coef.'
63     ff_formula: 'Type of the Frame force (FF) potential. Available types: harmonic,
64         gaussian.'
65     ff_opt_dist: 'Frame force (FF) optimal distance.'
66     ff_lin_thresh: 'Frame force (FF) distance after which the potential grows
67         linearly.
68
69         Must be strictly greater than ff_opt_dist.
70
71         Only applicable if ff_formula is harmonic.'
72     ff_coef: 'Frame force (FF) force coefficient.'
73     ff_coefevol: 'Enable or disable the changing FF coefficient value.
74
75         If True the coefficient will start as 0 at the beginning of the simulation and
76         reach ff_coef at the end.
77
78         If False the coefficient will have stable value of ff_coef.'
79 general:
80     input: data/data_downsample
81     output: results/results_downsample
82     genome: GRCg6a
83     pdf_report: false
84     remove_problematic: false
85 simulation:
86     platform: OpenCL
87     resolutions: 5,2,1,0.2
88     N_steps: 100
89     burnin: 10
90     MC_step: 1
91     sim_step: 100
92 forcefield:
93     ev_formula: harmonic
94     ev_min_dist: 2.0
95     ev_coef: 10.0
96     ev_coefevol: true
97     bb_formula: harmonic
98     bb_opt_dist: 1.0
99     bb_lin_thresh: 2.0
100    bb_coef: 10.0
101    bb_coefevol: false
102    sc_formula: harmonic
103    sc_opt_dist: 2.0
104    sc_lin_thresh: 2.5
105    sc_coef: 10.0
106    sc_coefevol: false
107    ff_formula: harmonic
108    ff_opt_dist: 1.0
109    ff_lin_thresh: 1.5

```

```
110 ff_coef: 10.0
111 ff_coefevol: false
```

## Ensemble

Parameters used for the ChromMovie ensemble study (Figure 4C of the manuscript). The full configuration file (config.yaml) is provided below.

```
1 descriptions:
2   general:
3     input: 'Folder containing input sChi-C contacts in csv format. If None simulated
4       sChi-C maps are going to be used.'
5     output: 'Output folder for storing simulation results.'
6     genome: 'Genome assembly of the input data. Currently supported assemblies: hg19,
7       hg38, mm10, GRCm39, GRCg6a.'
8     pdf_report: 'Whether to save the simulation diagnostics in a pdf format.'
9     remove_problematic: 'A flag indicating whether at each resolution round
10      problematic contacts that the simulation was unable to resolve,
11      should be removed.'
12  simulation:
13    platform: 'Available platforms: CPU, CUDA and OpenCL.'
14    resolutions: 'Resolutions to be used for hierarchical modeling. Expected to be
15      in the form of comma separated integer of float numbers in the units of Mb.'
16    N_steps: 'Number of simulation steps to take at every resolution.'
17    burnin: 'Number of simulation steps before starting collecting the simulation
18      diagnostic data.'
19    MC_step: 'Simulation diagnostic data is going to be collected every MC_step.'
20    sim_step: 'The simulation step of Langevin integrator.'
21  forcefield:
22    ev_formula: 'Type of the Excluded Volume (EV) repulsion. Available types:
23      harmonic.'
24    ev_min_dist: 'Excluded Volume (EV) minimal distance.'
25    ev_coef: 'Excluded Volume (EV) force coefficient.'
26    ev_coefevol: 'Enable or disable the changing EV coefficient value.
27
28      If True the coefficient will start as 0 at the beginning of the simulation and
29      reach ev_coef at the end.
30
31      If False the coefficient will have stable value of ev_coef.'
32    bb_formula: 'Type of the Backbone (BB) potential. Available types:
33      harmonic, gaussian.'
34    bb_opt_dist: 'Backbone (BB) optimal distance.'
35    bb_lin_thresh: 'Backbone (BB) distance after which the potential grows linearly.
36
37      Must be strictly greater than bb_opt_dist.
38
39      Only applicable if bb_formula is harmonic.'
40    bb_coef: 'Backbone (BB) force coefficient.'
41    bb_coefevol: 'Enable or disable the changing BB coefficient value.
42
43      If True the coefficient will start as 0 at the beginning of the simulation and
44      reach bb_coef at the end.
45
46      If False the coefficient will have stable value of bb_coef.'
```

```

47  sc_formula: 'Type of the Single cell contact (SC) potential. Available types:
48      harmonic, gaussian.'
49  sc_opt_dist: 'Single cell contact (SC) optimal distance.'
50  sc_lin_thresh: 'Single cell contact (SC) distance after which the potential grows
51      linearly.
52
53      Must be strictly greater than sc_opt_dist.
54
55      Only applicable if sc_formula is harmonic.'
56  sc_coef: 'Single cell contact (SC) force coefficient.'
57  sc_coefevol: 'Enable or disable the changing SC coefficient value.
58
59      If True the coefficient will start as 0 at the beginning of the simulation and
60      reach sc_coef at the end.
61
62      If False the coefficient will have stable value of sc_coef.'
63  ff_formula: 'Type of the Frame force (FF) potential. Available types: harmonic,
64      gaussian.'
65  ff_opt_dist: 'Frame force (FF) optimal distance.'
66  ff_lin_thresh: 'Frame force (FF) distance after which the potential grows
67      linearly.
68
69      Must be strictly greater than ff_opt_dist.
70
71      Only applicable if ff_formula is harmonic.'
72  ff_coef: 'Frame force (FF) force coefficient.'
73  ff_coefevol: 'Enable or disable the changing FF coefficient value.
74
75      If True the coefficient will start as 0 at the beginning of the simulation and
76      reach ff_coef at the end.
77
78      If False the coefficient will have stable value of ff_coef.'
79  general:
80      input: data/data_ensemble
81      output: results/results_ensemble_00
82      genome: GRCg6a
83      pdf_report: false
84      remove_problematic: false
85  simulation:
86      platform: OpenCL
87      resolutions: 5,2,1,0.2
88      N_steps: 100
89      burnin: 10
90      MC_step: 1
91      sim_step: 100
92  forcefield:
93      ev_formula: harmonic
94      ev_min_dist: 2.0
95      ev_coef: 10.0
96      ev_coefevol: true
97      bb_formula: harmonic
98      bb_opt_dist: 1.0
99      bb_lin_thresh: 2.0
100     bb_coef: 10.0

```

```

101 bb_coefevol: false
102 sc_formula: harmonic
103 sc_opt_dist: 2.0
104 sc_lin_thresh: 2.5
105 sc_coef: 10.0
106 sc_coefevol: false
107 ff_formula: harmonic
108 ff_opt_dist: 1.0
109 ff_lin_thresh: 1.5
110 ff_coef: 10.0
111 ff_coefevol: false

```

## Computational time

Parameters used for the ChromMovie computational time benchmarking study (Figure 5 of the manuscript). The full configuration file (config.yaml) is provided below.

```

1 descriptions:
2   general:
3     input: 'Folder containing input scHi-C contacts in csv format. If None simulated
4       scHi-C maps are going to be used.'
5     output: 'Output folder for storing simulation results.'
6     genome: 'Genome assembly of the input data. Currently supported assemblies: hg19,
7       hg38, mm10, GRCm39, GRCg6a.'
8     pdf_report: 'Whether to save the simulation diagnostics in a pdf format.'
9     remove_problematic: 'A flag indicating whether at each resolution round
10      problematic contacts that the simulation was unable to resolve,
11      should be removed.'
12   simulation:
13     platform: 'Available platforms: CPU, CUDA and OpenCL.'
14     resolutions: 'Resolutions to be used for hierarchical modeling. Expected to be
15       in the form of comma separated integer of float numbers in the units of Mb.'
16     N_steps: 'Number of simulation steps to take at every resolution.'
17     burnin: 'Number of simulation steps before starting collecting the simulation
18       diagnostic data.'
19     MC_step: 'Simulation diagnostic data is going to be collected every MC_step.'
20     sim_step: 'The simulation step of Langevin integrator.'
21   forcefield:
22     ev_formula: 'Type of the Excluded Volume (EV) repulsion. Available types:
23       harmonic.'
24     ev_min_dist: 'Excluded Volume (EV) minimal distance.'
25     ev_coef: 'Excluded Volume (EV) force coefficient.'
26     ev_coefevol: 'Enable or disable the changing EV coefficient value.
27
28       If True the coefficient will start as 0 at the beginning of the simulation and
29       reach ev_coef at the end.
30
31       If False the coefficient will have stable value of ev_coef.'
32     bb_formula: 'Type of the Backbone (BB) potential. Available types:
33       harmonic, gaussian.'
34     bb_opt_dist: 'Backbone (BB) optimal distance.'
35     bb_lin_thresh: 'Backbone (BB) distance after which the potential grows linearly.
36
37       Must be strictly greater than bb_opt_dist.

```

```

38
39     Only applicable if bb_formula is harmonic.'
40 bb_coef: 'Backbone (BB) force coefficient.'
41 bb_coefevol: 'Enable or disable the changing BB coefficient value.
42
43     If True the coefficient will start as 0 at the beginning of the simulation and
44     reach bb_coef at the end.
45
46     If False the coefficient will have stable value of bb_coef.'
47 sc_formula: 'Type of the Single cell contact (SC) potential. Available types:
48     harmonic, gaussian.'
49 sc_opt_dist: 'Single cell contact (SC) optimal distance.'
50 sc_lin_thresh: 'Single cell contact (SC) distance after which the potential grows
51     linearly.
52
53     Must be strictly greater than sc_opt_dist.
54
55     Only applicable if sc_formula is harmonic.'
56 sc_coef: 'Single cell contact (SC) force coefficient.'
57 sc_coefevol: 'Enable or disable the changing SC coefficient value.
58
59     If True the coefficient will start as 0 at the beginning of the simulation and
60     reach sc_coef at the end.
61
62     If False the coefficient will have stable value of sc_coef.'
63 ff_formula: 'Type of the Frame force (FF) potential. Available types: harmonic,
64     gaussian.'
65 ff_opt_dist: 'Frame force (FF) optimal distance.'
66 ff_lin_thresh: 'Frame force (FF) distance after which the potential grows
67     linearly.
68
69     Must be strictly greater than ff_opt_dist.
70
71     Only applicable if ff_formula is harmonic.'
72 ff_coef: 'Frame force (FF) force coefficient.'
73 ff_coefevol: 'Enable or disable the changing FF coefficient value.
74
75     If True the coefficient will start as 0 at the beginning of the simulation and
76     reach ff_coef at the end.
77
78     If False the coefficient will have stable value of ff_coef.'
79 general:
80     input: data/data_benchmark_001
81     output: results/results_benchmark_001
82     genome: mm10
83     pdf_report: false
84     remove_problematic: false
85 simulation:
86     platform: OpenCL
87     resolutions: 5,2,0.5,0.2,0.1
88     N_steps: 100
89     burnin: 99
90     MC_step: 1
91     sim_step: 20

```

```
92 forcefield:
93   ev_formula: harmonic
94   ev_min_dist: 1.0
95   ev_coef: 100.0
96   ev_coefevol: true
97   bb_formula: harmonic
98   bb_opt_dist: 1.0
99   bb_lin_thresh: 2.0
100  bb_coef: 100.0
101  bb_coefevol: false
102  sc_formula: harmonic
103  sc_opt_dist: 1.0
104  sc_lin_thresh: 1.5
105  sc_coef: 50.0
106  sc_coefevol: false
107  ff_formula: harmonic
108  ff_opt_dist: 1.0
109  ff_lin_thresh: 1.5
110  ff_coef: 50.0
111  ff_coefevol: false
```
